# Supplementary material for: The role of caspase-1, caspase-4 and NLRP3 in regulating the host cell response evoked by uropathogenic Escherichia coli
Source: PubMed Central journal article supplement (PMC8821701; doi:10.1038/s41598-022-06052-7), 2022-02-07
Supplement: 41598_2022_6052_MOESM1_ESM.pdf [file 41598_2022_6052_MOESM1_ESM.pdf]

Supplementary information

**The role of caspase-1, caspase-4 and NLRP3 in regulating the host cell response evoked by uropathogenic *Escherichia coli***

Anna Lindblad, Charlotte Johansson, Katarina Persson and Isak Demirel\*

School of Medical Sciences, Inflammatory Response and Infection Susceptibility Centre (iRiSC), Örebro University, Örebro, Sweden

\*Corresponding author: Isak Demirel, School of Medical Sciences, Campus USÖ, Örebro University, SE-701 82 Örebro, Sweden. *email:* isak.demirel@oru.se

**Supplementary Table S1.** Primers used for quantitative real-time PCR.

| <b>Gene symbol</b>             | <b>Oligonucleotide sequences (5'-3')</b>                               |
|--------------------------------|------------------------------------------------------------------------|
| <i>IL-1<math>\beta</math></i>  | <i>F:</i> CCACAGACCTTCCAGGAGAATG<br><i>R:</i> GTGCAGTTCAGTGATCGTACAGG  |
| <i>IL-18</i>                   | <i>F:</i> GATAGCCAGCCTAGAGGTATGG<br><i>R:</i> CCTTGATGTTATCAGGAGGATTCA |
| <i>IL-1<math>\alpha</math></i> | <i>F:</i> TGTATGTGACTGCCCAAGATGAAG<br><i>R:</i> AGAGGAGGTTGGTCTCACTACC |
| <i>IL-6</i>                    | <i>F:</i> AGACAGCCACTCACCTCTTCAG<br><i>R:</i> TTCTGCCAGTGCCTCTTTGCTG   |
| <i>IL-8</i>                    | <i>F:</i> GAGAGTGATTGAGAGTGGACCAC<br><i>R:</i> CACAACCCTCTGCACCCAGTTT  |
| <i>GAPDH</i>                   | <i>F:</i> GTCTCCTCTGACTTCAACAGCG<br><i>R:</i> ACCACCCTGTTGCTGTAGCCAA   |

| <b>Supplementary Table S2. Olink inflammation panel</b>       |                     |                   |
|---------------------------------------------------------------|---------------------|-------------------|
| <b>Protein name</b>                                           | <b>Abbreviation</b> | <b>Uniprot ID</b> |
| Eukaryotic translation initiation factor 4E-binding protein 1 | 4E-BP1              | Q13541            |
| Adenosine deaminase                                           | ADA                 | P00813            |
| Artemin                                                       | ARTN                | Q5T4W7            |
| Axin-1                                                        | AXIN1               | O15169            |
| Brain-derived neurotrophic factor                             | BDNF                | P23560            |
| Beta-nerve growth factor                                      | Beta-NGF            | P01138            |
| Caspase 8                                                     | CASP-8              | Q14790            |
| C-C motif chemokine 11                                        | CCL11               | P51671            |
| C-C motif chemokine 19                                        | CCL19               | Q99731            |
| C-C motif chemokine 20                                        | CCL20               | P78556            |
| C-C motif chemokine 23                                        | CCL23               | P55773            |
| C-C motif chemokine 25                                        | CCL25               | O15444            |
| C-C motif chemokine 28                                        | CCL28               | Q9NRJ3            |
| C-C motif chemokine 3                                         | CCL3                | P10147            |
| C-C motif chemokine 4                                         | CCL4                | P13236            |
| Cluster of differentiation 244                                | CD244               | Q9BZW8            |
| Cluster of differentiation 40                                 | CD40                | P25942            |
| Cluster of differentiation 5                                  | CD5                 | P06127            |
| Cluster of differentiation 6                                  | CD6                 | Q8WWJ7            |
| CUB domain-containing protein 1                               | CDCP1               | Q9H5V8            |
| Colony-stimulating factor 1                                   | CSF-1               | P09603            |
| Cystatin D                                                    | CST5                | P28325            |
| Fractalkine                                                   | CX3CL1              | P78423            |
| C-X-C motif chemokine 1                                       | CXCL1               | P09341            |
| C-X-C motif chemokine 10                                      | CXCL10              | P02778            |
| C-X-C motif chemokine 11                                      | CXCL11              | O14625            |
| C-X-C motif chemokine 5                                       | CXCL5               | P42830            |
| C-X-C motif chemokine 6                                       | CXCL6               | P80162            |
| C-X-C motif chemokine 9                                       | CXCL9               | Q07325            |
| Delta and Notch-like epidermal growth factor-related receptor | DNER                | Q8NFT8            |
| Protein S100-A12                                              | EN-RAGE             | P80511            |
| Fibroblasts growth factor 19                                  | FGF-19              | O95750            |
| Fibroblasts growth factor 21                                  | FGF-21              | Q9NSA1            |
| Fibroblasts growth factor 23                                  | FGF-23              | Q9GZV9            |
| Fibroblasts growth factor 5                                   | FGF-5               | Q8NF90            |
| Fms-related tyrosine kinase 3 ligand                          | Flt3L               | P49771            |
| Glial cell line-derived neurotrophic factor                   | GDNF                | P39905            |
| Hepatocyte growth factor                                      | HGF                 | P14210            |
| Interferon gamma                                              | IFN-gamma           | P01579            |
| Interleukin-1 alpha                                           | IL-1 alpha          | P01583            |
| Interleukin-10                                                | IL10                | P22301            |
| Interleukin-10 receptor subunit alpha                         | IL-10RA             | Q13651            |
| Interleukin-10 receptor subunit beta                          | IL-10RB             | Q08334            |

|                                                              |                |        |
|--------------------------------------------------------------|----------------|--------|
| Interleukin-12 subunit beta                                  | IL-12B         | P29460 |
| Interleukin-13                                               | IL13           | P35225 |
| Interleukin-15 receptor subunit alpha                        | IL-15RA        | Q13261 |
| Interleukin-17A                                              | IL-17A         | Q16552 |
| Interleukin-17C                                              | IL-17C         | Q9P0M4 |
| Interleukin-18                                               | IL18           | Q14116 |
| Interleukin-18 receptor 1                                    | IL-18R1        | Q13478 |
| Interleukin-2                                                | IL2            | P60568 |
| Interleukin-20                                               | IL-20          | Q9NYY1 |
| Interleukin-20 receptor subunit alpha                        | IL-20RA        | Q9UHF4 |
| Interleukin-22 receptor subunit alpha-1                      | IL-22 RA1      | Q8N6P7 |
| Interleukin-24                                               | IL-24          | Q13007 |
| Interleukin-2 receptor subunit beta                          | IL-2RB         | P14784 |
| Interleukin-33                                               | IL33           | O95760 |
| Interleukin-4                                                | IL4            | P05112 |
| Interleukin-5                                                | IL5            | P05113 |
| Interleukin-6                                                | IL6            | P05231 |
| Interleukin-7                                                | IL7            | P13232 |
| Interleukin-8                                                | IL8            | P10145 |
| Latency-associated peptide transforming growth factor beta-1 | LAP TGF-beta-1 | P01137 |
| Leukemia inhibitory factor                                   | LIF            | P15018 |
| Leukemia inhibitory factor receptor                          | LIF-R          | P42702 |
| Monocyte chemotactic protein 1                               | MCP-1          | P13500 |
| Monocyte chemotactic protein 2                               | MCP-2          | P80075 |
| Monocyte chemotactic protein 3                               | MCP-3          | P80098 |
| Monocyte chemotactic protein 3                               | MCP-4          | Q99616 |
| Matrix metalloproteinase-1                                   | MMP-1          | P03956 |
| Matrix metalloproteinase-10                                  | MMP-10         | P09238 |
| Neurturin                                                    | NRTN           | Q99748 |
| Neurotrophin-3                                               | NT-3           | P20783 |
| Osteoprotegerin                                              | OPG            | O00300 |
| Oncostatin-M                                                 | OSM            | P13725 |
| Programmed cell death 1 ligand 1                             | PD-L1          | Q9NZQ7 |
| Stem cell factor                                             | SCF            | P21583 |
| SIR2-like protein 2                                          | SIRT2          | Q8IXJ6 |
| Signaling lymphocytic activation molecule                    | SLAMF1         | Q13291 |
| Sulfotransferase 1A1                                         | ST1A1          | P50225 |
| STAM-binding protein                                         | STAMPB         | O95630 |
| Transforming growth factor alpha                             | TGF-alpha      | P01135 |
| Tumour necrosis factor                                       | TNF            | P01375 |
| Tumour necrosis factor-beta                                  | TNFB           | P01374 |
| Tumour necrosis factor receptor superfamily member 9         | TNFRSF9        | Q07011 |
| Tumour necrosis factor ligand superfamily member 14          | TNFSF14        | O43557 |
| TNF-related apoptosis-inducing ligand                        | TRAIL          | P50591 |
| TNF-related activation-inducing cytokine                     | TRANCE         | O14788 |

|                                                        |       |        |
|--------------------------------------------------------|-------|--------|
| Thymic stromal lymphopoietin                           | TSLP  | Q969D9 |
| Tumour necrosis factor (Ligand) superfamily, member 12 | TWEAK | O43508 |
| Urokinase-type plasminogen activator                   | uPA   | P00749 |
| Vascular endothelial growth factor A                   | VEGFA | P15692 |

Supplementary Figure S1

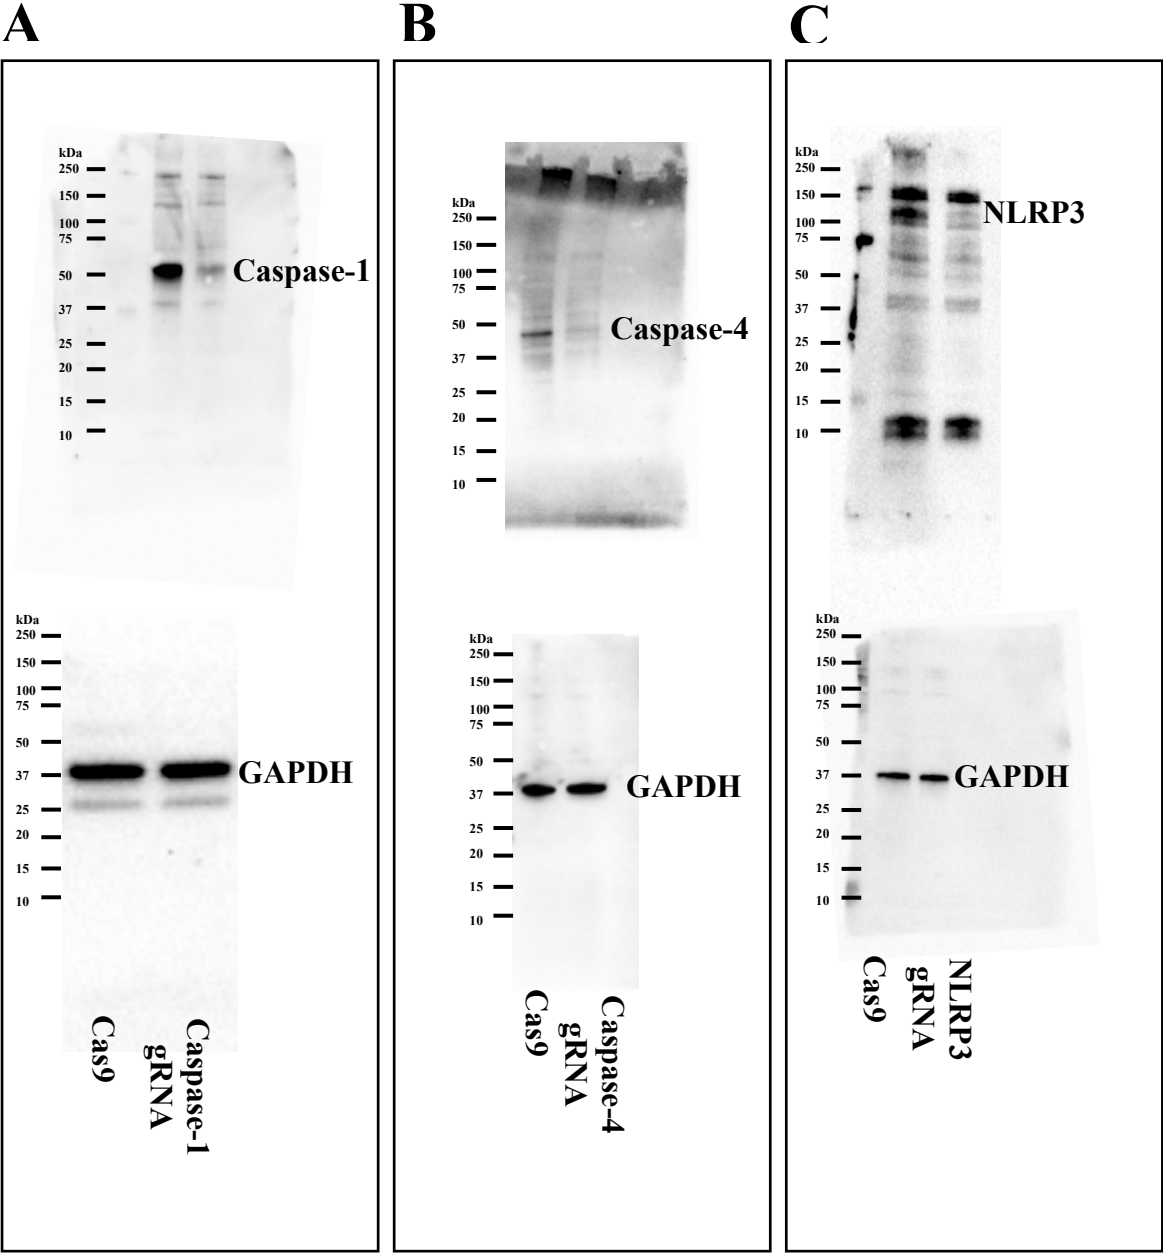

Supplementary Figure S1: Original whole western blots shown. The capsase-1 (A), caspase-4 (B), NLRP3 (C) and GAPDH (A-C) membranes were cut before antibody probing. This was done in order to probe for several proteins simultaneously.
